# Supplementary figures and images for: Cabut/dTIEG associates with the transcription factor Yorkie for growth control
Source: PubMed Central journal article supplement — EMBO Rep. 2015 Jan 8;16(3):362–9. doi: 10.15252/embr.201439193 (PMC4364875; doi:10.15252/embr.201439193), 2015-01-08

# Figure S3C

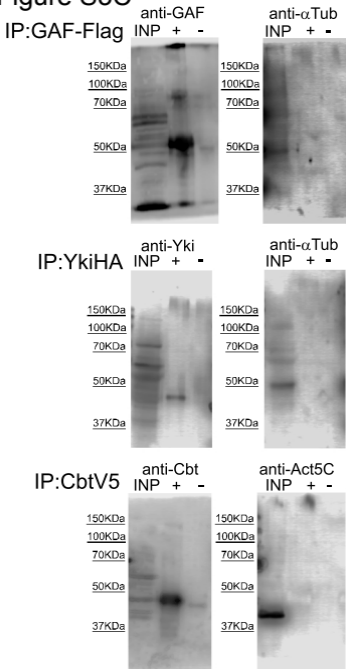

Supplement: embr0016-0362-sd5.pdf [file embr0016-0362-sd5.pdf]

# Figure 2F

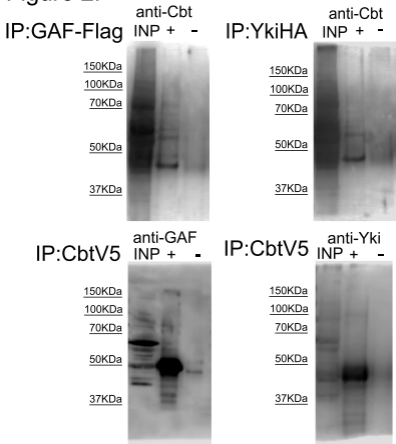

Supplement: embr0016-0362-sd7.pdf [file embr0016-0362-sd7.pdf]
